# Supplementary material
Source: PubMed Central journal article supplement (PMC4904246)
Supplement: jm6b00275_si_001.pdf [file jm6b00275_si_001.pdf]

## SUPPLEMENTAL METHODS, TABLES AND FIGURES

### Tetrahydro-2-naphthyl and 2-indanyl triazolopyrimidines targeting

#### *Plasmodium falciparum* dihydroorotate dehydrogenase display potent and selective antimalarial activity

Sreekanth Kokkonda<sup>1</sup>, Xiaoyi Deng<sup>2</sup>, Karen L. White<sup>3</sup>, Jose M. Coteron<sup>4</sup>, Maria Marco<sup>4</sup>, Laura de las Heras<sup>4</sup>, John White<sup>1</sup>, Farah El Mazouni<sup>2</sup>, Diana R. Tomchik<sup>5</sup>, Krishne Manjаланagara<sup>6</sup>, Kakali Rani Rudra<sup>6</sup>, Gong Chen<sup>3</sup>, Julia Morizzi<sup>3</sup>, Eileen Ryan<sup>3</sup>, Werner Kaminsky<sup>1</sup>, Didier LeRoy<sup>7</sup>, María Santos Martínez-Martínez<sup>4</sup>, Maria Belen Jimenez-Diaz<sup>4</sup>, Santiago Ferrer Bazaga<sup>4</sup>, Iñigo Angulo-Barturen<sup>4</sup>, David Waterson<sup>7</sup>, Jeremy N. Burrows<sup>7</sup>, Dave Matthews<sup>7</sup>, Susan A. Charman<sup>3</sup>, Margaret A. Phillips<sup>2\*</sup> and Pradipsinh K. Rathod<sup>1\*</sup>

<sup>1</sup>Departments of Chemistry and Global Health, University of Washington, Seattle, WA 98195;

<sup>2</sup>Departments of Pharmacology and <sup>5</sup>Biophysics, University of Texas Southwestern Medical Center at Dallas, 6001 Forest Park Blvd, Dallas, Texas 75390-9041; <sup>3</sup>Centre for Drug Candidate Optimisation, Monash Institute of Pharmaceutical Sciences, Monash University, Parkville, VIC 3052, Australia, <sup>4</sup>GSK, Tres Cantos Medicines Development Campus, Severo Ochoa, Madrid, 28760 Spain, <sup>6</sup>Syngene International Ltd, Bangalore, India, 560 099; <sup>7</sup>Medicines for Malaria Venture, 1215 Geneva, Switzerland.

\*Authors to whom all correspondence should be addressed. email:

[margaret.phillips@UTSouthwestern.edu](mailto:margaret.phillips@UTSouthwestern.edu), email: [rathod@chem.washington.edu](mailto:rathod@chem.washington.edu)

## Contents

### **Page Number: Title of Table or Figure**

#### **S3: Supplemental Methods**

**S3 : Scheme S1:**Synthesis of substituted inden-2-amine precursors 5a-c

**S6: Table S1:** Crystal data and structure refinement for **9** (Enantiomer-I)

**S7: Table S2.** Activity of select compounds on *P. falciparum* drug resistant strains

**S8: Table S3.** *Pf*DHODH-**13** x-ray diffraction data and refinement statistics.

**S9 : Table S4.** SCID mouse blood pharmacokinetics

**S10 : Fig. S1.** ORTEP of **9** Enantiomer-I structure with thermal ellipsoids at the 50% probability level.

**S11: Fig. S2.** Correlation of *Pf*DHODH activity versus *P. falciparum* 3D7 activity

**S12: Fig. S2.** *In vitro* *P. falciparum* growth inhibition comparing activity on wild-type 3D7 and D10 yDHODH parasites.

**S13: Fig. S4A.** Density map of *Pf*DHODH-**13** binding site

**S14: Fig. S4B.** Stereo diagram of the *Pf*DHODH-**13** x-ray structure showing the inhibitor binding-site.

## SUPPLEMENTARY METHODS

### CHEMISTRY

**5a-c** inden-2-amine precursors were synthesized by the reported procedure “U.S. Pat. Appl. 20100113512, 06, May 2010”

#### Scheme S1: Synthesis of substituted inden-2-amine precursors **5a-c**.<sup>a</sup>

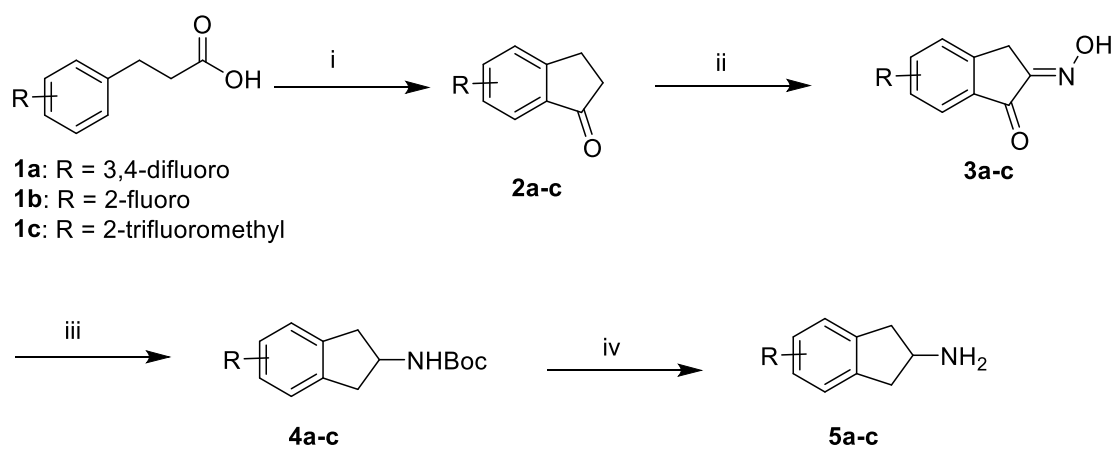

<sup>a</sup>Reagents and conditions: (i) ClSO<sub>3</sub>H, RT, 1h; (ii) acetyl chloride, isoamyl nitrite, MeOH, DCM, Heptane (iii) (a) Pd/C, 50 psi, AcOH, H<sub>2</sub>SO<sub>4</sub>, 60 °C, 12h; (b) Boc, TEA, DCM; (iv) HCl, Dioxane, RT, 2h

**5,6-difluoro-2,3-dihydro-1H-inden-1-one (2a).** 3-(3,4-difluorophenyl)propanoic acid (**1a**) (5.0 g, 26 mmol) was dissolved in chlorosulfonic acid (47.0 g, 402 mmol) at 0 °C. The reaction mixture was stirred at 25 °C for 1 h. After the reaction was complete, the reaction mixture was quenched by the slow addition of water at 0 °C, and then DCM (50 mL) was added. The two layers were separated, the aqueous layer extracted with DCM and the organic layers were dried over Na<sub>2</sub>SO<sub>4</sub>. The solvent was removed under reduced pressure to obtain 4.1 g (91% yield) of 5,6-difluoro-2,3-dihydro-1H-inden-1-one (**2a**) as a pale yellow solid.

<sup>1</sup>H NMR (400 MHz, CDCl<sub>3</sub>): δ 7.53 (t, *J* = 8.24 Hz, 1H), 7.26 (t, *J* = 7.84 Hz, 1H), 3.14 – 3.11 (m, 2H), 2.75 – 2.72 (m, 2H).

**(E)-5,6-difluoro-2-(hydroxyimino)-2,3-dihydro-1H-inden-1-one (3a):** Acetyl chloride (3.4 mL) was added drop wise to the mixture of methanol (2.2 mL), DCM (29 mL), heptane (19 mL) at 0 °C. After 15min, 5,6-difluoro-2,3-dihydro-1H-inden-1-one (**2a**) (4.1 g, 16 mmol) in DCM(12 mL) was added drop wise, followed by 3-methyl butyl nitrite (3.7 g, 22 mmol). The reaction mixture was stirred at room temperature for 2 h. Solid precipitated was collected by filtration and dried under vacuum to obtain 3.8 g (79% yield) of (E)-5,6-difluoro-2-(hydroxyimino)-2,3-dihydro-1H-inden-1-one (**3a**) as off-white solid. <sup>1</sup>H NMR (400 MHz, DMSO-*d*<sub>6</sub>): δ 12.76 (s, 1H), 7.84–7.72 (m, 2H), 3.75 (s, 2H). *m/z* = 196.2 (M-1)

**Tert-butyl (5,6-difluoro-2,3-dihydro-1H-inden-2-yl)carbamate (4a)**

To a solution of (E)-5,6-difluoro-2-(hydroxyimino)-2,3-dihydro-1H-inden-1-one (**3a**) (2.0 g, 10 mmol) in acetic acid (60 mL), H<sub>2</sub>SO<sub>4</sub> (4 mL) was added palladium on carbon(1.2 g, 11 mmol). The reaction mixture was hydrogenated at 50 psi at 60 °C for 12 h. After the completion reaction the reaction mixture was cooled, filtered over celite and washed with methanol. The filtrate concentrated under reduced pressure. Residue was dissolved in DCM (5mL), neutralized with triethylamine (2.8 g) and BOC anhydride (3 g) was added and stirred for 1h at 25 °C. Reaction mixture was washed with water and brine solution and dried over Na<sub>2</sub>SO<sub>4</sub>, filtered and concentrated under reduced pressure. The crude product was purified by column chromatography to obtain 0.37 g (13.7% yield) of tert-butyl (5,6-difluoro-2,3-dihydro-1H-inden-2-yl)carbamate (**4a**).

**5,6-difluoro-2,3-dihydro-1H-inden-2-amine hydrochloride (5a)**

Tert-butyl (5,6-difluoro-2,3-dihydro-1H-inden-2-yl)carbamate was dissolved in DCM (4 mL) HCl-Dioxane (10 mL) was added drop wise at 0 °C and stirred at 25 °C for 2 h. The volatiles

were removed under reduced pressure to obtain 0.25 g (90% yield) of 5,6-difluoro-2,3-dihydro-1H-inden-2-amine hydrochloride.  $^1\text{H}$  NMR (400 MHz, DMSO- $d_6$ ):  $\delta$  8.11 (s, 2H), 7.38 – 7.34 (m, 2H), 4.05 – 4.01 (m, 1H) 3.28 – 3.22 (m, 2H), 2.92 – 2.87 (m, 2H);  $m/z$  =170 (MH) $^+$ .

**4-fluoro-2,3-dihydro-1H-inden-2-amine hydrochloride (5b).**

The compound was prepared following similar procedures to the ones followed for **5a**, except for the synthesis of intermediate **2b**, which was:

**4-fluoro-2,3-dihydro-1H-inden-1-one (2b):** To a solution of 3-(2-fluorophenyl)propanoic acid (**1b**) (5.0 g, 29 mmol) in DCM at 0 °C was added oxalyl chloride (5.4 g, 44 mmol) followed by 2-3 drops of DMF. The resulting mixture was stirred until no more gas evolution was observed. After concentration of the reaction mixture, the residue was dissolved in DCM (35 mL), cooled to 0 °C and AlCl<sub>3</sub> (3.8 g, 29 mmol) was added in 3 portions at 3 minute intervals. After stirring for 1 h, the reaction mixture was quenched in ice water and the layers were separated. The aqueous layer was extracted twice with ether and the combined organic extracts were washed with water, saturated NaHCO<sub>3</sub>, brine solution, dried over Na<sub>2</sub>SO<sub>4</sub> and concentrated under reduced pressure to obtain 4.1 g (91.9% yield) of 4-fluoro-2,3-dihydro-1H-inden-1-one (**2b**).

**4-fluoro-2,3-dihydro-1H-inden-2-amine hydrochloride (5b):**  $^1\text{H}$  NMR (400 MHz, DMSO- $d_6$ ):  $\delta$  8.30 (s, 2H), 7.29 (d,  $J$  = 8.32 Hz, 1H), 7.14 (d,  $J$  = 9.12 Hz, 1H), 7.04 – 6.99 (m, 1H), 4.04 – 4.00 (m, 1H), 3.30 – 3.20 (m, 2H), 3.01 – 2.90 (m, 2H);  $m/z$  =152 (MH) $^+$ .

**4-(trifluoromethyl)-2,3-dihydro-1H-inden-2-amine hydrochloride (5c).** The compound was prepared following similar procedures to the ones followed for **5a**.

**4-(trifluoromethyl)-2,3-dihydro-1H-inden-2-amine hydrochloride (5c):**  $^1\text{H}$  NMR (400 MHz, DMSO- $d_6$ ):  $\delta$  8.37 (s, 2H), 7.61 –7.54 (m, 2H), 7.44 (d,  $J$  = 7.64 Hz, 1H), 4.10 – 4.06 (m, 1H), 3.46 – 3.37 (m, 2H), 3.17 – 3.03 (m, 2H);  $m/z$  =202.2 (MH) $^+$ .

## SUPPLEMENTAL TABLES

**Table S1:** Crystal data and structure refinement for **9** (Enantiomer-I).

|                                   |                                                                  |                  |
|-----------------------------------|------------------------------------------------------------------|------------------|
| Empirical formula                 | C <sub>18</sub> H <sub>18</sub> Cl F <sub>2</sub> N <sub>5</sub> |                  |
| Formula weight                    | 377.82                                                           |                  |
| Temperature                       | 100(2) K                                                         |                  |
| Wavelength                        | 0.71073 Å                                                        |                  |
| Crystal system                    | Monoclinic                                                       |                  |
| Space group                       | P 2 <sub>1</sub>                                                 |                  |
| Unit cell dimensions              | a = 8.4266(16) Å                                                 | α = 90°.         |
|                                   | b = 29.117(5) Å                                                  | β = 90.876(10)°. |
|                                   | c = 13.891(3) Å                                                  | γ = 90°.         |
| Volume                            | 3407.8(11) Å <sup>3</sup>                                        |                  |
| Z                                 | 8                                                                |                  |
| Density (calculated)              | 1.473 Mg/m <sup>3</sup>                                          |                  |
| Absorption coefficient            | 0.258 mm <sup>-1</sup>                                           |                  |
| F(000)                            | 1568                                                             |                  |
| Crystal size                      | 0.20 x 0.13 x 0.10 mm <sup>3</sup>                               |                  |
| Theta range for data collection   | 1.62 to 28.33°.                                                  |                  |
| Index ranges                      | -11 ≤ h ≤ 11, -38 ≤ k ≤ 38, -18 ≤ l ≤ 18                         |                  |
| Reflections collected             | 113483                                                           |                  |
| Independent reflections           | 16915 [R(int) = 0.0703]                                          |                  |
| Completeness to theta = 25.00°    | 99.9 %                                                           |                  |
| Max. and min. transmission        | 0.9747 and 0.9503                                                |                  |
| Refinement method                 | Full-matrix least-squares on F <sup>2</sup>                      |                  |
| Data / restraints / parameters    | 16915 / 1 / 945                                                  |                  |
| Goodness-of-fit on F <sup>2</sup> | 1.021                                                            |                  |
| Final R indices [I > 2σ(I)]       | R1 = 0.0409, wR2 = 0.0822                                        |                  |
| R indices (all data)              | R1 = 0.0587, wR2 = 0.0895                                        |                  |
| Absolute structure parameter      | -0.01(3)                                                         |                  |
| Largest diff. peak and hole       | 0.357 and -0.297 e.Å <sup>-3</sup>                               |                  |

**Table S2.** Activity of select compounds on *P. falciparum* drug resistant strains

| <b>Cmpd</b> | <b>EC<sub>50</sub>, nM</b> |            |            |           |           |                |
|-------------|----------------------------|------------|------------|-----------|-----------|----------------|
|             | <b>3D7</b>                 | <b>Dd2</b> | <b>HB3</b> | <b>D6</b> | <b>K1</b> | <b>TM90C2B</b> |
| <b>35</b>   | 40                         | 43         | 21         | 55        | 49        | 36             |
| <b>9</b>    | 1.2                        | 1.2        | 0.47       | 1.5       | 1.7       | 1.3            |

The tested strains have resistance to the following agents:

3D7 - sulfadoxine

Dd2 – chloroquine, quinine, mefloquine, pyrimethamine, cycloguanil, sulfadoxine

HB3 – pyrimethamine

D6 - none

K1 – chloroquine, pyrimethamine, cycloguanil

TM90C2B - atovaquone, chloroquine, cycloguanil, pyrimethamine

**Table S3.** *Pf*DHODH-13 X-ray diffraction data and refinement statistics.

| <b>Data Collection</b>                    |                                             |
|-------------------------------------------|---------------------------------------------|
| Resolution (Å)                            | 31.6 - 2.32 (2.36 - 2.32)                   |
| Space group                               | P6 <sub>4</sub>                             |
| Cell dimensions (Å)                       | <i>a</i> = <i>b</i> =86.1, <i>c</i> = 139.1 |
| Wavelength (Å)                            | 0.97918                                     |
| Unique reflections                        | 25,176 (1,224)                              |
| Data Completeness (%)                     | 99.5 (99.3)                                 |
| Redundancy                                | 12.5 (10.9)                                 |
| <i>I</i> / $\sigma$                       | 43.4 (1.0)                                  |
| R <sub>merge</sub> (%) <sup>a</sup>       | 4.8 (100)                                   |
| R <sub>pim</sub> (%) <sup>b</sup>         | 1.7 (68.9)                                  |
| Wilson B-value (Å <sup>2</sup> )          | 30.7                                        |
| <b>Refinement</b>                         |                                             |
| Resolution (Å)                            | 31.6 - 2.32 (2.43 - 2.32)                   |
| Unique reflections                        | 21,301 (1021)                               |
| Data Completeness (%)                     | 84.4 (32.5)                                 |
| R <sub>work</sub> / R <sub>free</sub> (%) | 17.7 (22.5)/ 21.1(25.2)                     |
| No. of atoms/ water                       | 2966 /65                                    |
| <i>rms deviations</i>                     |                                             |
| Bond length (Å)                           | 0.004                                       |
| Bond angles (deg.)                        | 0.85                                        |
| Mean B (Å <sup>2</sup> )                  | 49.3                                        |
| <i>Ramachandran plot</i> <sup>c</sup>     |                                             |
| Favored/Allowed (%)                       | 96.1/3.9                                    |
| Missing residues                          | 159-160, 344-354, 567-569                   |

Data for the outermost shell are given in parentheses.

<sup>a</sup>R<sub>merge</sub> = 100  $\sum_h \sum_i |I_{h,i} - \langle I_h \rangle| / \sum_h \sum_i \langle I_{h,i} \rangle$ , where the outer sum (h) is over the unique reflections and the inner sum (i) is over the set of independent observations of each unique reflection.

<sup>b</sup>R<sub>pim</sub> = 100  $\sum_h \sum_i [1/(n_h - 1)]^{1/2} |I_{h,i} - \langle I_h \rangle| / \sum_h \sum_i \langle I_{h,i} \rangle$ , where n<sub>h</sub> is the number of observations of reflections **h**<sup>1</sup>

<sup>c</sup>As defined by the validation suite MolProbity<sup>2</sup>

1. Evans, P. R., An introduction to data reduction: space-group determination, scaling and intensity statistics. *Acta Crystallogr D Biol Crystallogr* **2011**, 67 (Pt 4), 282-92.
2. Chen, V. B.; Arendall, W. B., 3rd; Headd, J. J.; Keedy, D. A.; Immormino, R. M.; Kapral, G. J.; Murray, L. W.; Richardson, J. S.; Richardson, D. C., MolProbity: all-atom structure validation for macromolecular crystallography. *Acta Crystallogr D Biol Crystallogr* **2010**, 66 (Pt 1), 12-21.



**Table S4.** SCID mouse blood pharmacokinetics

| <b>Cmpd</b> | <b>Target Dose (mg/Kg)</b> | <b>C<sub>max</sub> (μM)</b> | <b>T<sub>max</sub> (h)</b> | <b>AUC<sub>(0-last)</sub> μM.h</b> |
|-------------|----------------------------|-----------------------------|----------------------------|------------------------------------|
| <b>35</b>   | 10 (14)                    | 10.3                        | 8                          | 124 <sup>a</sup>                   |
|             | 30 (35.2)                  | 14.5                        | 2                          | 137 <sup>a</sup>                   |
| <b>9</b>    | 10                         | 0.77                        | 4                          | 4.1 <sup>b</sup>                   |
|             | 30 (36.8)                  | 2.83                        | 4                          | 28.0 <sup>a</sup>                  |
| <b>7</b>    | 10                         | 1.19                        | 4                          | 6.51 <sup>b</sup>                  |
|             | 30                         | 2.20                        | 2                          | 22.8 <sup>a</sup>                  |

<sup>a</sup>t=23 h, <sup>b</sup>t= 8 h. Doses in parenthesis are measured doses where different from the target dose.

## SUPPLEMENTAL FIGURES

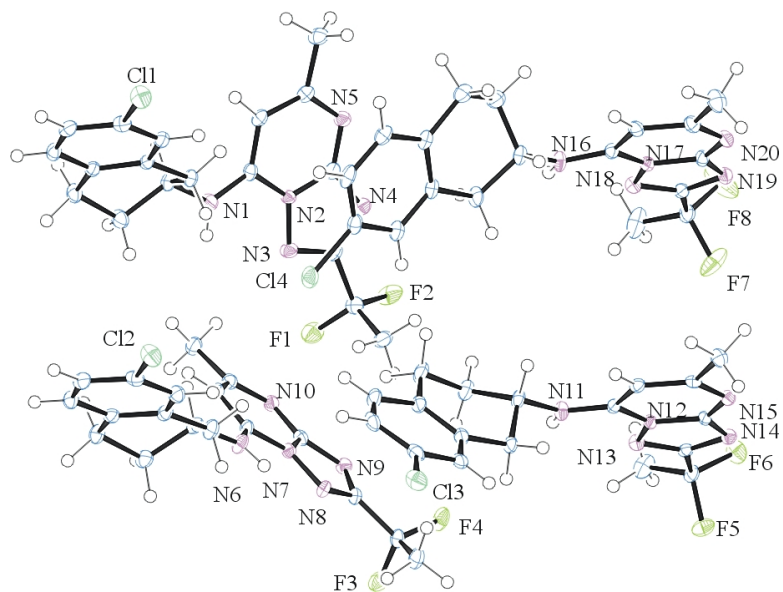

**Fig. S1.** ORTEP of **9** Enantiomer-I structure with thermal ellipsoids at the 50% probability level.

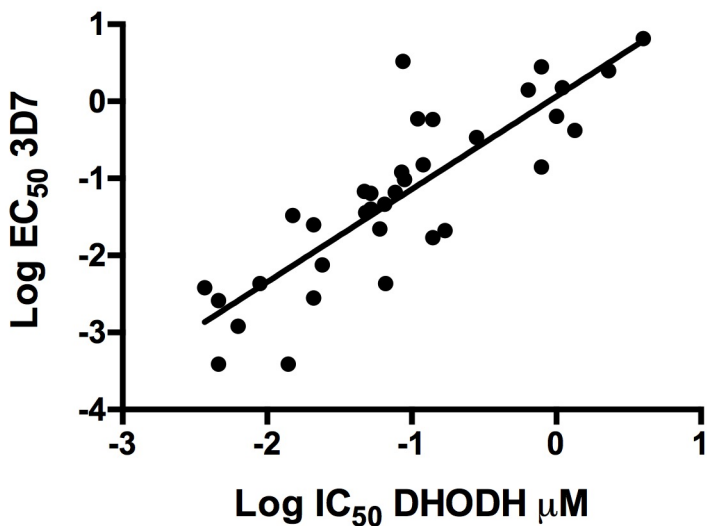

**Fig. S2. Correlation of *Pf*DHODH activity versus *P. falciparum* 3D7 activity.** The log of the EC<sub>50</sub> obtained on *P. falciparum* 3D7 cells is plotted versus the log of the IC<sub>50</sub> for *Pf*DHODH. Data are taken from Table 1. The slope of the correlation line is  $1.2 \pm 0.13$  and the R square is 0.73.

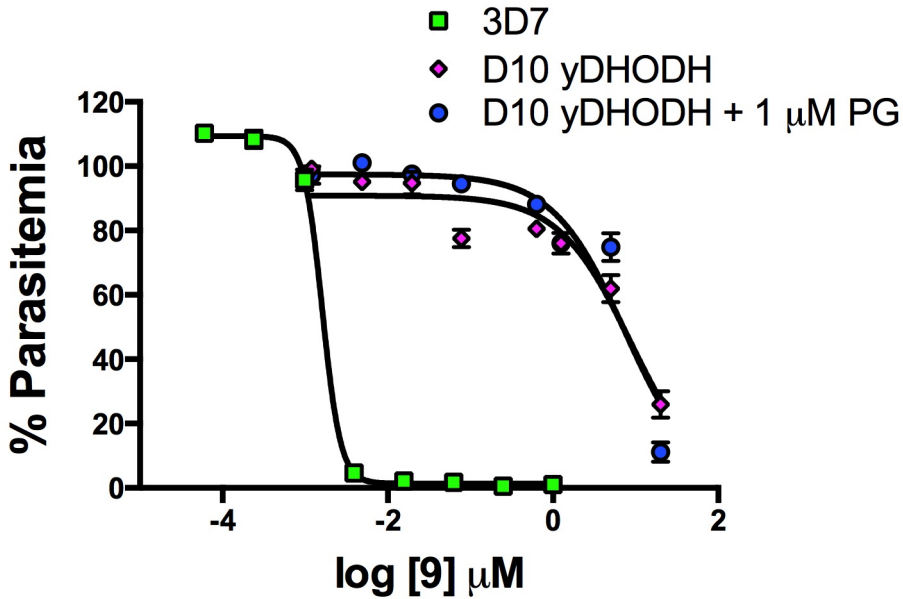

**Fig. S3.** *In vitro* *P. falciparum* growth inhibition comparing activity on wild-type 3D7 and D10 yDHODH parasites. The dose response curves for the D10 yDHODH line were done  $\pm 1 \mu\text{M}$  proguanil. 3D7 data were fitted to log (I) vs response – variable slope 4 parameter fit in Graph Pad Prism and D10 yDHODH data were fitted to  $Y = Y_0 / (1 + (X/IC_{50}))$ , where X is the concentration of inhibitor. Error bars represent the standard deviation of the mean for 3 replicates. The fitted  $EC_{50}$ 's; 95% confidence interval were: 3D7 ( $0.0016 \mu\text{M}$ ; 95% CI  $0.0011 - 0/0013$ ); D10 yDHODH ( $8.6 \mu\text{M}$ ; 95% CI  $6.0 - 11.3$ ); D10 yDHODH + proguanil (PG) ( $7.4 \mu\text{M}$ ; 95% CI  $4.7 - 10$ )

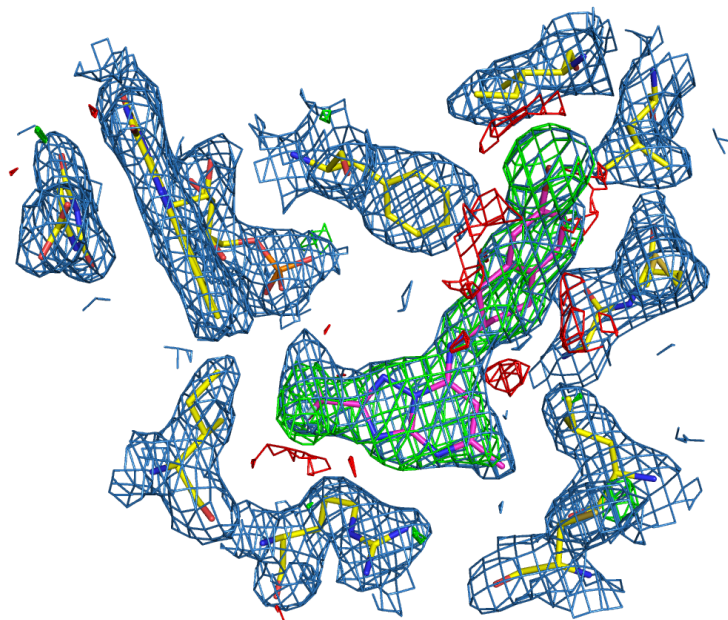

**Fig. S4A.** Electron density map of *PfDHODH-13* binding site.  $2F_o - F_c$  electron density map (blue) of the fully refined structure contoured at  $1.0 \sigma$ .  $F_o - F_c$  map (green), contoured at  $3 \sigma$  showing the positive density for the compound prior to refinement. Negative density  $F_o - F_c$  map (red) contoured at  $-3 \sigma$ .

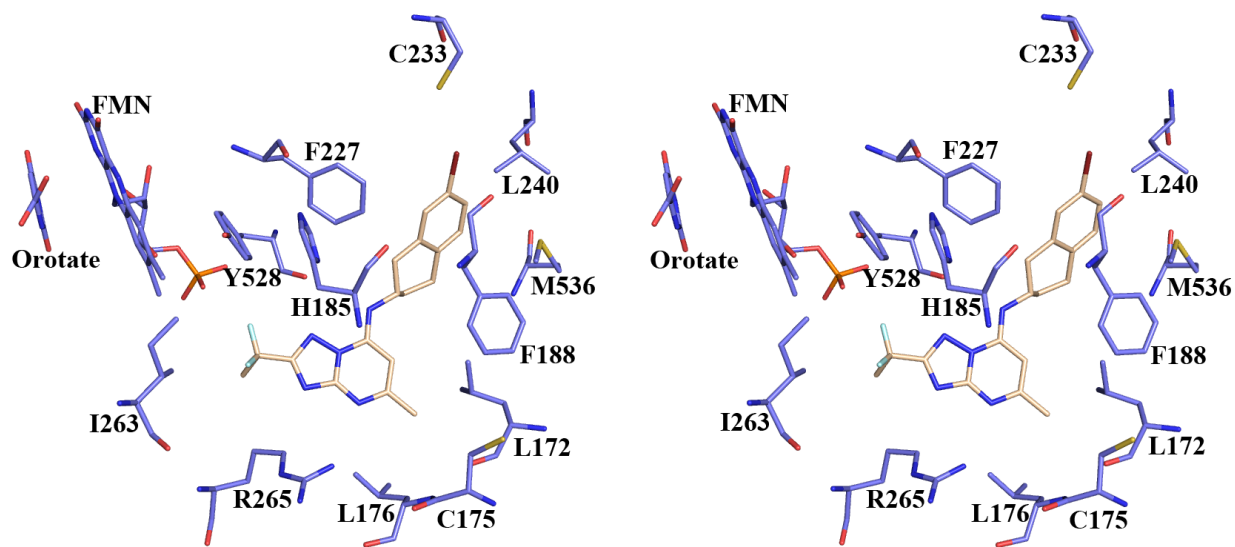

**Fig. S4B.** Stereo diagram of the *PfDHODH-13* x-ray structure showing the inhibitor binding-site. Select residues within the 4Å inhibitor shell are shown. **13** is shown in tan, protein carbons are shown in purple, nitrogens are blue, oxygens are red, sulfur is light yellow, fluorines are light blue, and bromine is deep red.
